# Supplementary material for: Disjoint combinations profiling (DCP): a new method for the prediction of antibody CDR conformation from sequence
Source: PubMed Central journal article supplement (PMC4103075; doi:10.7717/peerj.455), 2014-07-01
Supplement: peerj-02-455-s004.pdf [file peerj-02-455-s004.pdf]

# H1-10-I

**N** 1 2 3 4 5 6 7 8 9 10 **C**

SA AA SS TG YY TT DD TH SV GG

H1-13-I

**Z** 1 2 3 4 5 6 7 8 9 10 11 12 13 **C**

A sequence of 13 stylized letters: K, A, S, C, G, F, F, H, S, H, Y, M, K, M, I. The letters are arranged in a row, numbered 1 to 13. The letters are rendered in a bold, black, sans-serif font. The letters are increasingly distorted from left to right, with the first letter (K) being the most legible and the last letter (I) being the most distorted. The distortion includes horizontal stretching, vertical stretching, and a loss of fine detail, resulting in a more abstract, blocky appearance. The letters are set against a white background with a subtle grid of thin lines.

# H1-13-II

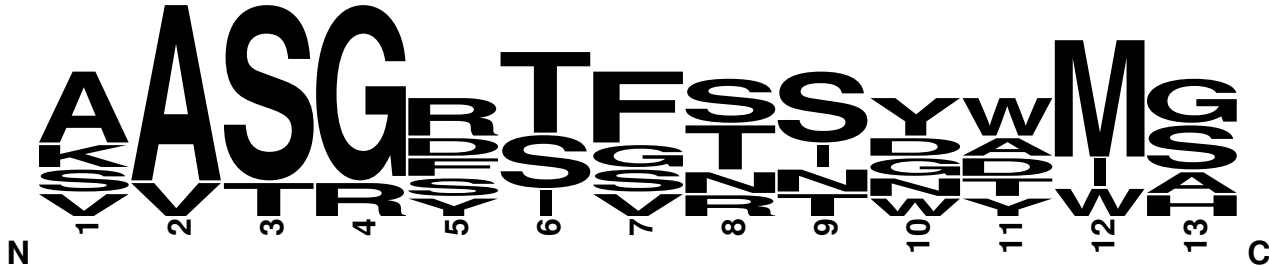



H1-13-IV

**A A S G R S S R P C A M A**  
**A V S R S T Y S S W T T G**

**N** 1 2 3 4 5 6 7 8 9 10 11 12 13 **C**

H1-13-V

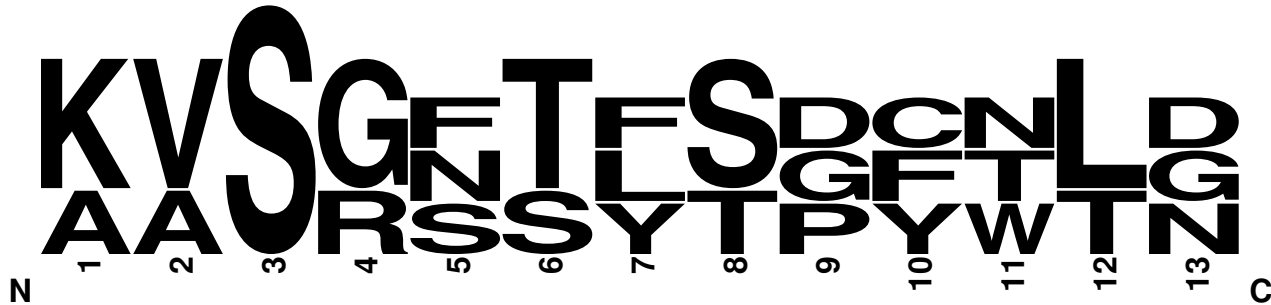

H1-13-VI

**TASRRRTGSSNWCMMG**

**Z** **1** **2** **3** **4** **5** **6** **7** **8** **9** **10** **11** **12** **13** **C**

H1-13-VII

**Z** 1 **A** 2 **V** 3 **S** 4 **G** 5 **G** 6 **S** 7 **|** 8 **S** 9 **S** 10 **G** 11 **D** 12 **Y** 13 **Y** **C**



# H1-13-VIII

**N** 1 **A** 2 **A** 3 **S** 4 **G** 5 **Z** 6 **T** 7 **F** 8 **S** 9 **I** 10 **N** 11 **Y** 12 **M** 13 **G** **C**

H1-13-IX

**K A S G G P F R S Y A I S**

**Z 1 2 3 4 5 6 7 8 9 10 11 12 13 C**

H1-13-X

**A A S G Y T D S R Y C M A**

**Z 1 2 3 4 5 6 7 8 9 10 11 12 13 C**

H1-13-XI

**K A S G Y T F T S Y W M H**

**Z 1 2 3 4 5 6 7 8 9 10 11 12 13 C**

H1-13-XII

**A A S G A T G S T Y D M G**

**Z 1 2 3 4 5 6 7 8 9 10 11 12 13 C**

H1-14-I

**Z** 1 2 3 4 5 6 7 8 9 10 11 12 13 14 **C**

T V I G Y S | T S Z Y K W H

H1-15-I

N 1 2 3 4 5 6 7 8 9 10 11 12 13 14 15 C

H K S G F S L S T K Z K K V W

H1-15-II

**N** 1 2 3 4 5 6 7 8 9 10 11 12 13 14 15 **C**

**T S F S G F S L R T S R V G V S**



H1-15-III

**AASGFRFTFNWYMD**

**Z 1 2 3 4 5 6 7 8 9 10 11 12 13 14 15 C**

H1-16-I

**AASGGSEYSSYSTFSLG**

**Z** **1** **2** **3** **4** **5** **6** **7** **8** **9** **10** **11** **12** **13** **14** **15** **16** **C**

H2-8-I

**T I L P G S H K**  
**W V Y P G S H K**  
**1 2 3 4 5 6 7 8**

**N**

**C**

# H2-9-I

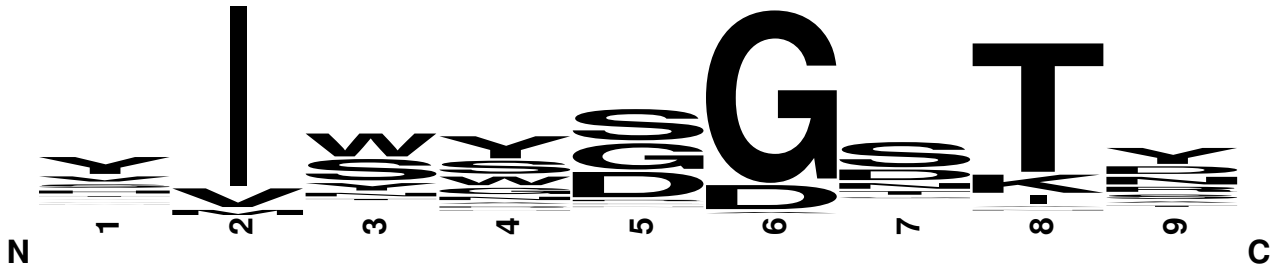

# H2-9-II

**N**

**1**  
**SY**

**2**

—

**3**

**RY**

**4**

**YZ**

**5**

**GS**

**6**

**VT**

**7**

**ST**

**8**

**T**

**9**

**TE**

**C**

H2-9-III

**Y A H S R V S A Y**

**N**

**1**

**2**

**3**

**4**

**5**

**6**

**7**

**8**

**9**

**C**

H2-9-IV

**Z** **1** **2** **3** **4** **5** **6** **7** **8** **9** **C**

H2-9-V

**N** 1 2 3 4 5 6 7 8 9 **C**



H2-9-VI

**N**  
1  
**N**  
2  
**V**  
3  
**Y**  
4  
**D**  
5  
**S**  
6  
**G**  
7  
**D**  
8  
**T**  
9  
**N**  
C

# H2-10-I

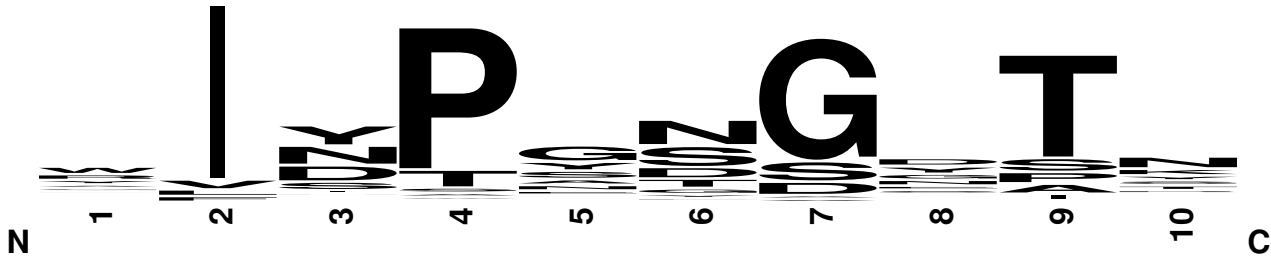

# H2-10-II

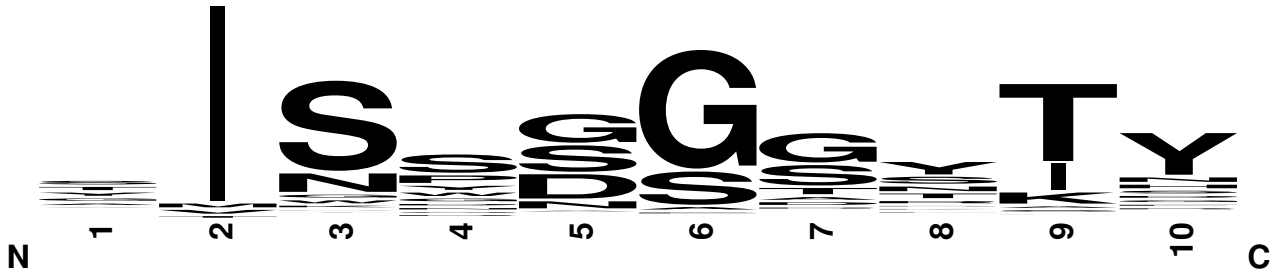

H2-10-III

**Y**  
1

**I**  
2

**S**  
3

**S**  
4

**G**  
5

**G**  
6

**G**  
7

**S**  
8

**T**  
9

**Y**  
10

**C**

H2-10-IV

**A V S G S G G S T Y**

**N 1 2 3 4 5 6 7 8 9 10 C**

H2-10-V

**N** **1** **2** **3** **4** **5** **6** **7** **8** **9** **10** **C**

**A**  
**E** | **L**  
**P**  
**D**  
**S**  
**A**  
**R**  
**T**  
**N**  
**Y**

H2-10-VI

**A M D S G G G G T L**

**N 1 2 3 4 5 6 7 8 9 10 C**

H2-10-VII

**Z** **1** **2** **3** **4** **5** **6** **7** **8** **9** **10** **C**



H2-10-VIII

**W I F H G S D N T E**

**Z 1 2 3 4 5 6 7 8 9 10 C**

H2-10-IX

**Z** 1 2 3 4 5 6 7 8 9 10 **C**

**G F T G P A E G E I I**  
**E G N Y T Y**

H2-10-X

**W**  
Z 1 2 3 4 5 6 7 8 9 10 C

H2-11-I

**Z**

**1**

**G**

**2**

**Y**

**3**

**I**

**4**

**Y**

**5**

**H**

**6**

**S**

**7**

**G**

**8**

**S**

**9**

**T**

**10**

**D**

**11**

**C**

H2-12-I

**W** **I** **R** **N** **K** **A** **N** **G** **L** **A** **T** **J**

**1** **2** **3** **4** **5** **6** **7** **8** **9** **10** **11** **12**

**N** **C**

H2-12-II

**E I R L N S D N E A T H**

**Z 1 2 3 4 5 6 7 8 9 10 11 12 C**

H2-12-III

**F I G N K A N D Y T E**

**Z 1 2 3 4 5 6 7 8 9 10 11 12 C**

H2-12-IV

**L**  
1

**I**  
2

**D**  
3

**W**  
4

**D**  
5

**D**  
6

**D**  
7

**T**  
8

**Y**  
9

**Y**  
10

**I**  
11

**T**  
12

**C**



H2-15-I

**Z** 1 2 3 4 5 6 7 8 9 10 11 12 13 14 15 **C**

**T I G R N L V G P S D F Y T R**

H2-15-II

**Z** 1 2 3 4 5 6 7 8 9 10 11 12 13 14 15 **C**

**SLSHCHCASHYWNRRGWTY**

L1-7-I

**Q A N G Y L N**

**Z 1 2 3 4 5 6 7 C**

L1-9-I

**R T S Q Y G S L A**  
**T A A S S G H M T**

**N**   **1**   **2**   **3**   **4**   **5**   **6**   **7**   **8**   **9**   **C**

L1-9-II

**TGTSTNNFVS**

**N**   **1**   **2**   **3**   **4**   **5**   **6**   **7**   **8**   **9**   **C**



L1-11-I

**W R A S Q Z V W X Y Z**

**1 2 3 4 5 6 7 8 9 10 11**

**N C**

L1-11-II

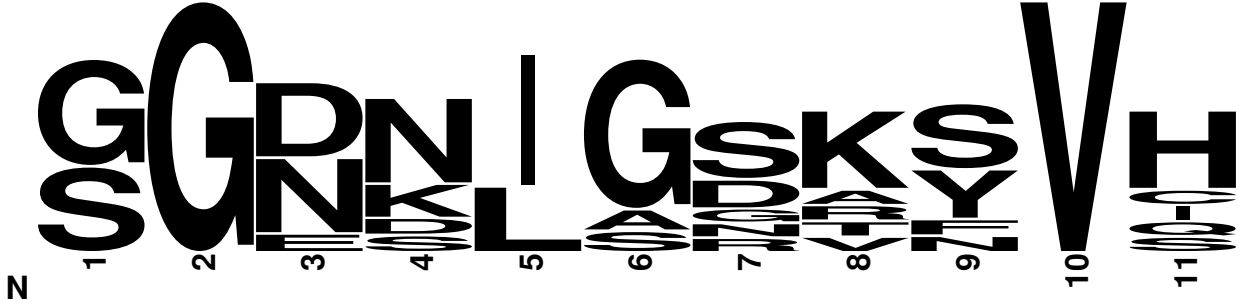





L1-11-IV

**RASQASYSVA**

**Z 1 2 3 4 5 6 7 8 9 10 11 C**

L1-12-I

**STRASSVILLE TOWN**

**1 2 3 4 5 6 7 8 9 10 11 12**

**N C**

L1-12-II

**Z** **1** **2** **3** **4** **5** **6** **7** **8** **9** **10** **11** **12** **C**

**RASQS** **V** **SS** **ZNS** **QNK** **LA**

L1-12-III

**R A S H S L R S R R L A**  
**T S T S S L S S Y V H**

**Z** 1 2 3 4 5 6 7 8 9 10 11 12 **C**

L1-12-IV

**Z** 1 2 3 4 5 6 7 8 9 10 11 12 **C**

L1-13-I

**S**  
1

**SG**  
2

**SS**  
3

**SSS**  
4

**SSSS**  
5

**SSSSS**  
6

**SSSSSS**  
7

**SSSSSSS**  
8

**SSSSSSSS**  
9

**SSSSSSSSS**  
10

**SSSSSSSSSS**  
11

**SSSSSSSSSSS**  
12

**SSSSSSSSSSSS**  
13

**N**

**C**

L1-13-II

**Z** **1** **2** **3** **4** **5** **6** **7** **8** **9** **10** **11** **12** **13** **C**

**TRSSGZLIASNYVQ**



L1-13-III

**T G N S N N V G N Q G A A**

**Z 1 2 3 4 5 6 7 8 9 10 11 12 13 C**

L1-14-I

**R S S T G A V T T S N Y A N**

1 2 3 4 5 6 7 8 9 10 11 12 13 14

Z C

L1-14-II

**Z**  
1 **ZH**  
2 **GI**  
3 **TI**  
4 **SI**  
5 **ZS**  
6 **ZD**  
7 **V**  
8 **GG**  
9 **GG**  
10 **Y**  
11 **Y**  
12 **YS**  
13 **V**  
14 **VS**

L1-14-III

**Z** 1 2 3 4 5 6 7 8 9 10 11 12 13 14 **C**



L1-14-IV

**Z** 1 2 3 4 5 6 7 8 9 10 11 12 13 14 **C**

L1-14-V

**T G S S N I G A G G E T T V K**

**Z 1 2 3 4 5 6 7 8 9 10 11 12 13 14 C**

L1-14-VI

**Z** 1 2 3 4 5 6 7 8 9 10 11 12 13 14 **C**

L1-14-VII

**Z** **1** **2** **3** **4** **5** **6** **7** **8** **9** **10** **11** **12** **13** **14** **C**

**TGTSSDVGGNYS**



L1-15-I

**RASVS DZYG ZYSEM**

1 2 3 4 5 6 7 8 9 10 11 12 13 14 15

Z C

L1-15-II

**R**  
1

**A**  
2

**S**  
3

**K**  
4

**Q**  
5

**R**  
6

**V**  
7

**S**  
8

**S**  
9

**G**  
10

**Y**  
11

**S**  
12

**Y**  
13

**M**  
14

**H**  
15

**C**

L1-16-I

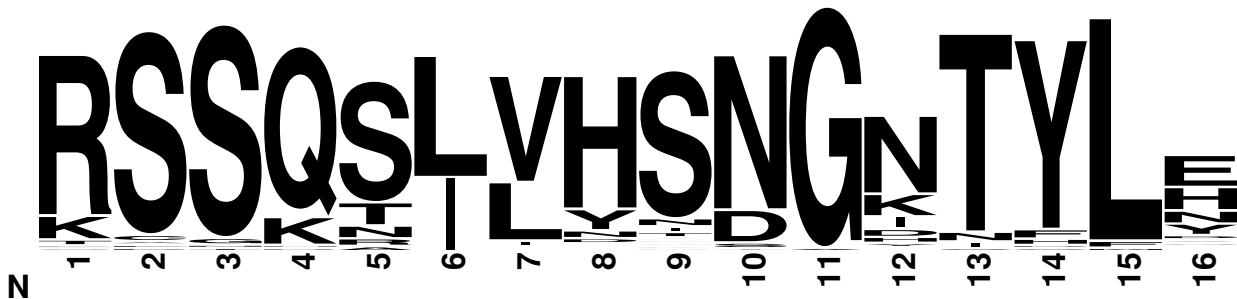

L1-16-II

**Z** 1 2 3 4 5 6 7 8 9 10 11 12 13 14 15 16 **C**

L1-16-III

**Z** 1 2 3 4 5 6 7 8 9 10 11 12 13 14 15 16 **C**

L1-16-IV

**Z** **1** **2** **3** **4** **5** **6** **7** **8** **9** **10** **11** **12** **13** **14** **15** **16** **C**

**R** **S** **S** **E** **V** **I** **V** **T** **R** **N** **G** **Y** **T** **P** **I** **E**

L1-16-V

**R S S Q S L G H S S G N T Y L H**

**Z 1 2 3 4 5 6 7 8 9 10 11 12 13 14 15 16 C**

L1-17-I

**Z** 1 **K** 2 **S** 3 **S** 4 **Q** 5 **Z** 6 **L** 7 **T** 8 **Y** 9 **N** 10 **S** 11 **G** 12 **T** 13 **Q** 14 **K** 15 **N** 16 **Y** 17 **L** **A** **C**



L2-7-I

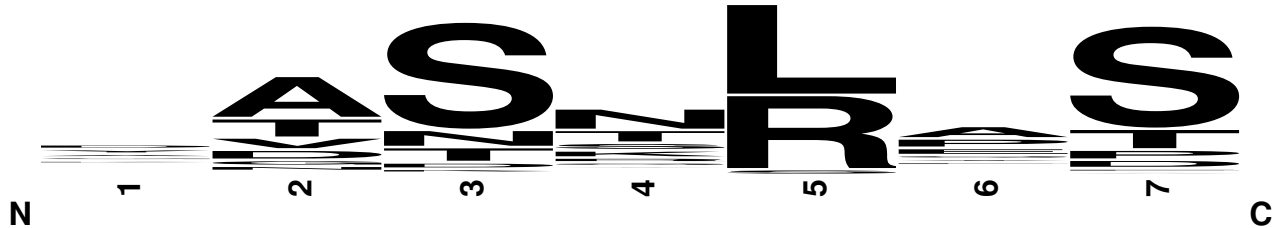

**Z**

**1**  
**MG**

**2**  
**MG**

**3**  
**N**

**4**  
**HZ**

**5**  
**RD**

**6**  
**RD**

**7**  
**SD**

**C**

**L2-7-II**

L2-7-III

**TYT** **S** **Z** **W** **Q** **S**

**N** **1** **2** **3** **4** **5** **6** **7** **C**

L2-11-I

**L K K Q D G S H S T G D**

**Z 1 2 3 4 5 6 7 8 9 10 11 C**

L2-11-II

**Y F S Q S D K S Q G P**

**Z 1 2 3 4 5 6 7 8 9 10 11 C**

L3-5-I

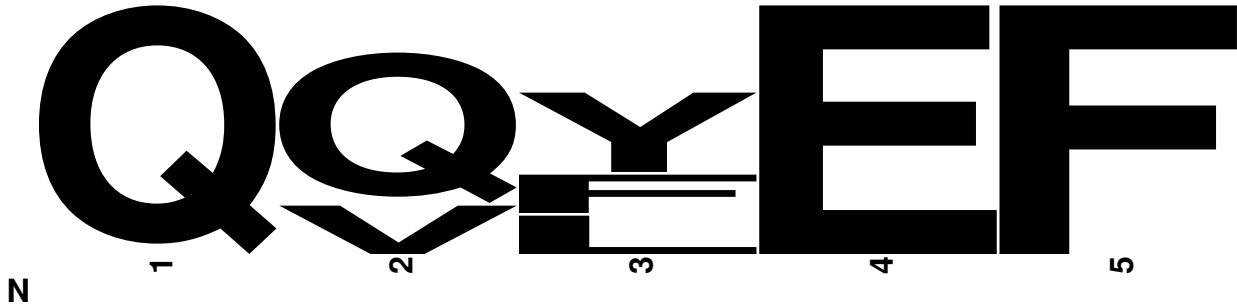

L3-7-I

**Q**  
1

**Q**  
2

**Q**  
3

**Q**  
4

**S**  
5

**Y**  
6

**Y**  
7

**N**

**C**

L3-8-I

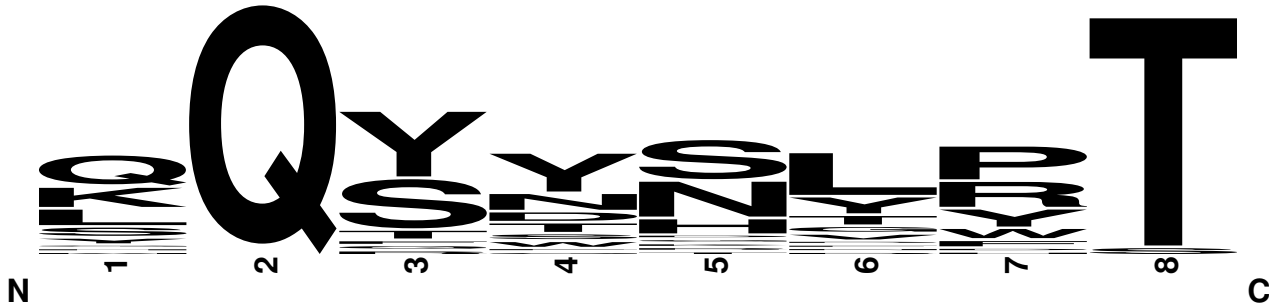

N

1

2

3

4

5

6

7

8

C



# L3-8-II

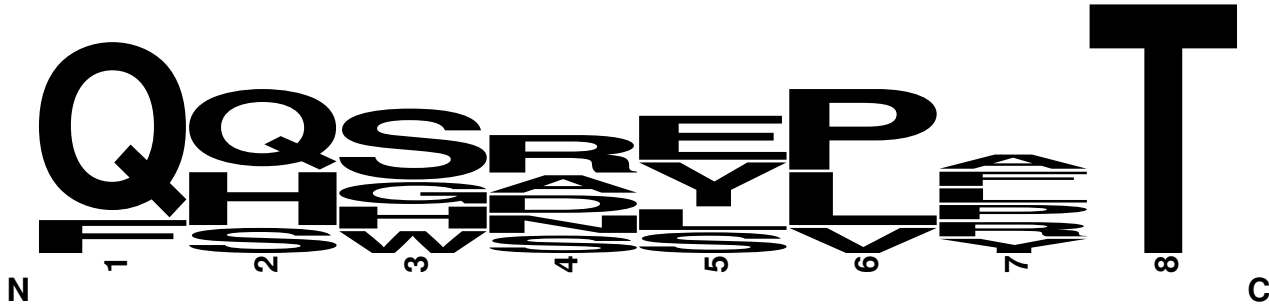



L3-8-IV

**Q**  
1

**Q**  
2

**H**  
3

**H**  
4

**Y**  
5

**G**  
6

**S**  
7

**T**  
8

**T**  
8

**C**

L3-8-V

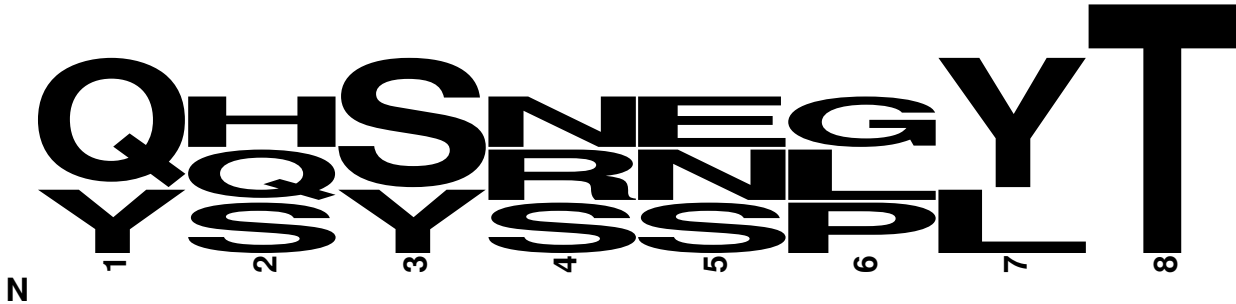

L3-8-VI

**Q**  
1  
**N**  
2  
**W**  
3  
**R**  
4  
**S**  
5  
**S**  
6  
**P**  
7  
**T**  
8  
**C**

# L3-9-I

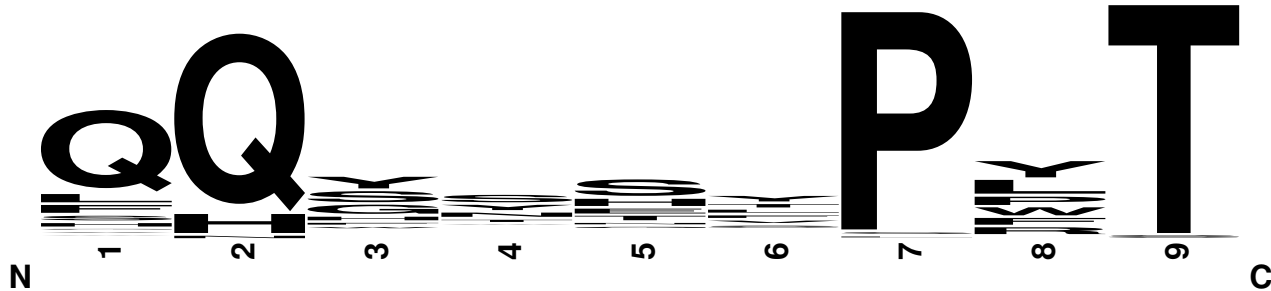

# L3-9-II

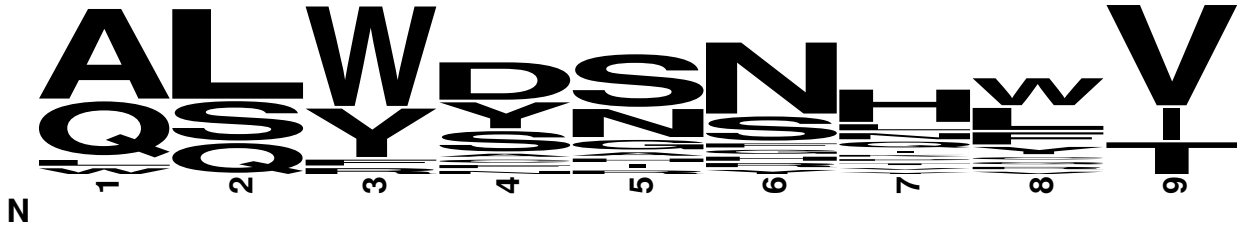





L3-9-IV

**Q A W D A S T G V**

**N**

**1**

**2**

**3**

**4**

**5**

**6**

**7**

**8**

**9**

**C**

L3-9-V

**Q V W Y G A S S Y T**

**N**

**1**

**2**

**3**

**4**

**5**

**6**

**7**

**8**

**9**

**C**

L3-9-VI

Q A R L L L P Q T

N

1

2

3

4

5

6

7

8

9

C

L3-10-I

**SKSLTSDRDRRv**

**N** **1** **2** **3** **4** **5** **6** **7** **8** **9** **10** **C**

L3-10-II

**Q S W D G N A N F V**  
**S V Y E S S D S V**

**N**   **1**   **2**   **3**   **4**   **5**   **6**   **7**   **8**   **9**   **10**   **C**

L3-10-III

**Q**  
**G**  
1

**S**  
**T**  
2

**Y**  
**W**  
3

**D**  
**D**  
4

**S**  
**S**  
5

**S**  
**Z**  
6

**L**  
**G**  
7

**D**  
**Z**  
8

**A**  
**K**  
9

**V**  
**R**  
10

**N** **C**

L3-10-IV

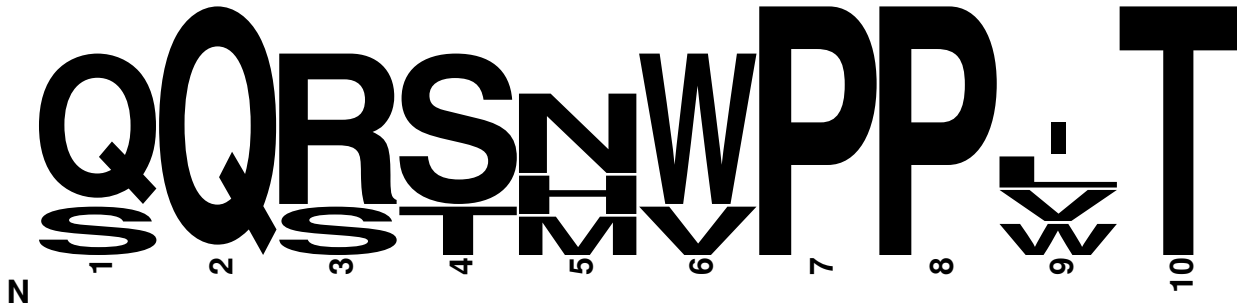

L3-10-V

**Q**  
**G**

**A**  
**V**

**W**  
**M**

**D**  
**V**

**S**  
**S**

**L**  
**T**

**D**  
**Z**

**Z**  
**Y**

**V**

**N** 1 2 3 4 5 6 7 8 9 10 **C**



L3-10-VI

**A T W D G S L R T V**

**Z 1 2 3 4 5 6 7 8 9 10 C**

L3-10-VII

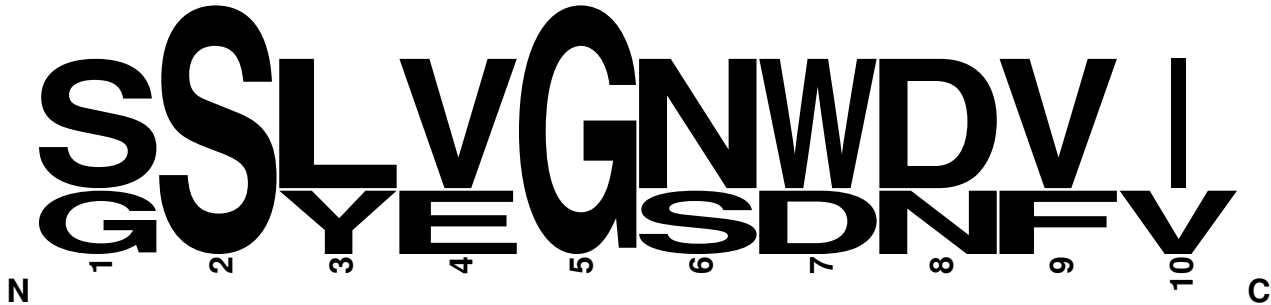

L3-10-VIII

**Y**  
1

**S**  
2

**D**  
3

**|**  
4

**S**  
5

**N**  
6

**G**  
7

**Y**  
8

**P**  
9

**L**  
10

**Z** **C**

L3-10-IX

**Q**  
1

**H**  
2

**H**  
3

**Y**  
4

**G**  
5

**T**  
6

**P**  
7

**P**  
8

**L**  
9

**T**  
10

**Z** **C**

L3-10-X

**Z** 1 2 3 4 5 6 7 8 9 10 **C**

L3-10-XI

**L**  
1

**Y**  
2

**S**  
3

**R**  
4

**E**  
5

**E**  
6

**P**  
7

**P**  
8

**W**  
9

**T**  
10

**C**

L3-10-XII

**Z** **1** **2** **3** **4** **5** **6** **7** **8** **9** **10** **C**

# L3-11-I

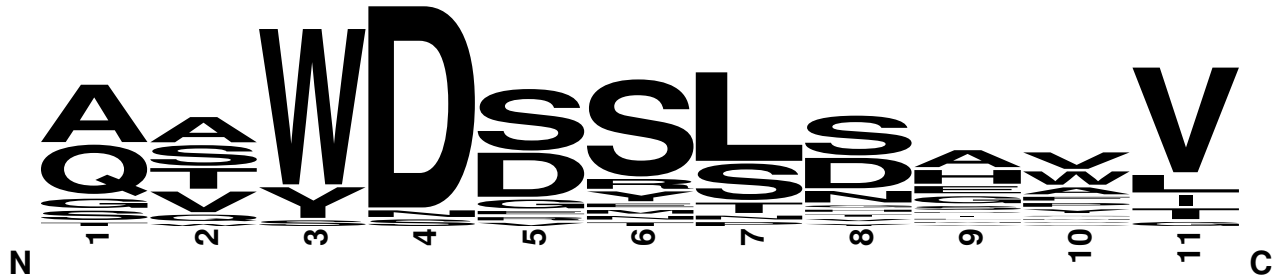



L3-11-II

**Z** **1** **2** **3** **4** **5** **6** **7** **8** **9** **10** **11** **C**

L3-11-III

**Z** 1 2 3 4 5 6 7 8 9 10 11 **C**

L3-11-IV

**Z** **1** **2** **3** **4** **5** **6** **7** **8** **9** **10** **11** **C**

L3-11-V

**A A F D D S G D G A V**  
**S T W T M S L N V T**

**N** 1 2 3 4 5 6 7 8 9 10 11 **C**

L3-11-VI

**R**  
**Y**

**S**

**T**  
**W**

**D**  
**N**

**S**

**G**  
**N**

**G**  
**L**

**S**  
**T**

**F**  
**Y**

**F**  
**S**

**V**

**Z**   **1**   **2**   **3**   **4**   **5**   **6**   **7**   **8**   **9**   **10**   **11**   **C**

L3-11-VII

**Q** **Q** **Y** **Y** **S** **Y** **S** **A** **P** **V** **T**

**Z** **1** **2** **3** **4** **5** **6** **7** **8** **9** **10** **11** **C**

L3-11-VIII

**A A W D D S R G G P D**

**N 1 2 3 4 5 6 7 8 9 10 11 C**

L3-11-IX

**LSSYGDNNNDLV**

**Z** **1** **2** **3** **4** **5** **6** **7** **8** **9** **10** **11** **C**



L3-12-I

**LGGYPAAASYRTA**

**Z** **1** **2** **3** **4** **5** **6** **7** **8** **9** **10** **11** **12** **C**

L3-12-II

**A T W D S G L S A D W W**

**Z 1 2 3 4 5 6 7 8 9 10 11 12 C**

L3-12-III

**A A W D R R L N A F V V**  
**T T W D R S P T G Y W V**

**Z 1 2 3 4 5 6 7 8 9 10 11 12 C**

L3-12-IV

**A A W D S S L S G G Q L**  
**G T W D S S L S T P Y V**

**N** 1 2 3 4 5 6 7 8 9 10 11 12 **C**

L3-13-I

**Z** 1 2 3 4 5 6 7 8 9 10 11 12 13 **C**

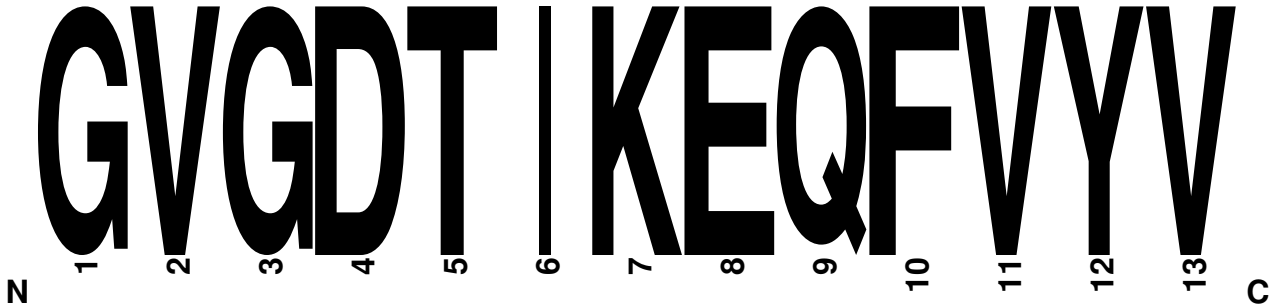

L3-13-II

**Z** 1 2 3 4 5 6 7 8 9 10 11 12 13 **C**

L3-13-III

**A S W D D S R G G P D Y V**

**Z 1 2 3 4 5 6 7 8 9 10 11 12 13 C**
